# Supplementary material for: Novel Biomarkers for Early Detection of Acute Kidney Injury and Prediction of Long-Term Kidney Function Decline after Partial Nephrectomy
Source: Biomedicines. 2023 Mar 28;11(4):1046. doi: 10.3390/biomedicines11041046 (PMC10135876; doi:10.3390/biomedicines11041046)
Supplement: Supplementary file 1 [file biomedicines-11-01046-s001.zip › Table S1.pdf]

**Supplementary Table S1.** Clinical and laboratory predictors of AKI at different postoperative time points, stratified by the occurrence of AKI

|                     |       | tot                           | AKI                           | Non AKI                       | OR<br>[CI95%]              | p value | AUC [IC95%]       |
|---------------------|-------|-------------------------------|-------------------------------|-------------------------------|----------------------------|---------|-------------------|
| Serum<br>creatinine | 4 hr  | 1.03<br>(0.90; 1.26)          | 1.15<br>(0.98; 1.38)          | 0.92<br>(0.79; 1.08)          | 45.10<br>[1.6; 1269]       | 0.03    | 0.76 [0.60; 0.92] |
|                     | 10 hr | 1.04<br>(0.86; 1.41)          | 1.25<br>(1.04; 1.46)          | 0.90<br>(0.75; 1.21)          | 15.7<br>[1.36;<br>181.1]   | 0.03    | 0.75 [0.59; 0.92] |
|                     | 24 hr | 1.06<br>(0.88; 1.39)          | 1.40<br>(1.08; 1.50)          | 0.94<br>(0.84; 1.12)          | 61.7<br>[3.26;1168]        | <0.01   | 0.83 [0.70; 0.97] |
| Cystatin C          | 4 hr  | 1.06<br>(0.84; 1.24)          | 1.10<br>(1.04; 1.30)          | 0.89 (0.79;<br>1.12)          | 19.52<br>[0.97;392.0<br>0] | 0.05    | 0.73 [0.55; 0.90] |
|                     | 10 hr | 1.04<br>(0.86; 1.31)          | 1.19<br>(0.96; 1.39)          | 0.92<br>(0.84; 1.22)          | 8.07<br>[0.86;<br>75.87]   | 0.07    | 0.68 [0.50; 0.86] |
|                     | 24 hr | 0.99<br>(0.84; 1.23)          | 1.17<br>(0.98; 1.43)          | 0.92<br>(0.75; 1.10)          | 42.02<br>[1.77;998.8<br>9] | 0.02    | 0.77 [0.61; 0.92] |
| Serum<br>NGAL       | 4 hr  | 307.92<br>(242.48;<br>429.60) | 372.71<br>(289.96;<br>463.99) | 262.39<br>(204.12;<br>394.45) | 1.00<br>[1.00; 1.01]       | 0.13    | 0.69 [0.51; 0.88] |

|                       |       |                               |                               |                               |                          |      |                      |
|-----------------------|-------|-------------------------------|-------------------------------|-------------------------------|--------------------------|------|----------------------|
|                       | 10 hr | 304.74<br>(234.50;<br>545.14) | 375.63<br>(300.04;<br>585.40) | 268.28<br>(215.67;<br>351.65) | 1.00<br>[1.00; 1.01]     | 0.07 | 0.75 [0.56; 0.93]    |
|                       | 24 hr | 267.09<br>(192.98;<br>421.66) | 473.92<br>(293.62;<br>525.65) | 207.36<br>(184.88;<br>332.12) | 1.01<br>[1.00; 1.02]     | 0.01 | 0.82 [0.64;<br>1.00] |
| Urinary<br>NGAL       | 4 hr  | 0.0<br>(0.0; 93.6)            | 41.2 (0.0;<br>665.7)          | 0.0<br>(0.0; 25.8)            | 1.04<br>[0.99; 1.08]     | 0.09 | 0.71 [0.54;<br>0.87] |
|                       | 10 hr | 136.8 (0.0;<br>297.5)         | 177.5 (8.2;<br>1160.8)        | 74.3 (0.0;<br>214.0)          | 1.02<br>[1.00;1.03]      | 0.07 | 0.66 [0.49;<br>0.84] |
|                       | 24 hr | 244.9<br>(102.2;<br>480.5)    | 287.2<br>(108.6;<br>749.4)    | 234.3 (0.0;<br>462.7)         | 1.00<br>[0.99;1.01]      | 0.67 | 0.55 [0.35;<br>0.74] |
| NephroChe<br>ck® Test | 4 hr  | 0.30 (0.08;<br>0.74)          | 0.64 (0.32;<br>1.07)          | 0.14 (0.04;<br>0.33)          | 3.50<br>[0.86;14.24<br>] | 0.08 | 0.78 [0.64;<br>0.93] |
|                       | 10 hr | 0.47 (0.20;<br>1.09)          | 0.63 (0.39;<br>1.36)          | 0.34 (0.11;<br>0.64)          | 1.50 [0.75;<br>3.00]     | 0.26 | 0.68 [0.51;<br>0.85] |
|                       | 24 hr | 0.30 (0.08;<br>0.88)          | 0.42 (0.16;<br>1.10)          | 0.21 (0.06;<br>0.84)          | 1.76 [0.46;<br>6.76]     | 0.41 | 0.59 [0.34;<br>0.84] |
| Proteinuria           | 4 hr  | 23.50<br>(14.00;<br>43.00)    | 24.50<br>(14.00;<br>66.00)    | 23.50<br>(15.00;<br>42.50)    | 1.00 [0.98;<br>1.02]     | 0.88 | 0.49 [0.28;<br>0.71] |

|                               |       |                              |                               |                              |                       |       |                      |
|-------------------------------|-------|------------------------------|-------------------------------|------------------------------|-----------------------|-------|----------------------|
|                               | 10 hr | 23.00<br>(13.00;<br>49.00)   | 28.00<br>(14.50;<br>50.50)    | 22.00<br>(13.00;<br>38.00)   | 1.00 [0.98;<br>1.02]  | 0.76  | 0.53 [0.33;<br>0.73] |
|                               | 24 hr | 25.00<br>(14.00;<br>52.00)   | 31.50<br>(21.00;<br>48.00)    | 21.00<br>(14.00;<br>52.00)   | 1.00 [0.98;<br>1.02]  | 0.98  | 0.41 [0.21;<br>0.60] |
| Proteinuria/<br>Creatininuria | 4 hr  | 0.51 (0.29;<br>0.76)         | 0.65 (0.32;<br>0.88)          | 0.42 (0.29;<br>0.64)         | 2.91 [0.28;<br>29.76] | 0.37  | 0.59 [0.37;<br>0.80] |
|                               | 10 hr | 0.33 (0.23;<br>0.52)         | 0.32 (0.22;<br>0.49)          | 0.37 (0.28;<br>0.54)         | 1.59 [0.17;<br>15.30] | 0.69  | 0.46 [0.27;<br>0.65] |
|                               | 24 hr | 0.39 (0.26;<br>0.57)         | 0.40 (0.21;<br>0.57)          | 0.36 (0.29;<br>0.52)         | 1.15 [0.12;<br>10.75] | 0.90  | 0.46 [0.24;<br>0.67] |
| Albuminuria                   | 4 hr  | 189.60<br>(70.00;<br>388.90) | 352.30<br>(253.30;<br>602.90) | 124.90<br>(62.60;<br>382.60) | 1.00 [1.00;<br>1.01]  | 0.19  | 0.67 [0.44;<br>0.90] |
|                               | 10 hr | 150.45<br>(75.40;<br>256.40) | 194.60<br>(80.00;<br>388.45)  | 132.30<br>(68.70;<br>222.70) | 1.00 [1.00;<br>1.01]  | 0.23  | 0.57 [0.33;<br>0.80] |
|                               | 24 hr | 94.25<br>(66.20;<br>217.50)  | 84.60<br>(70.40;<br>281.20)   | 95.40<br>(66.20;<br>153.00)  | 1.00 [1.00;<br>1.01]  | 0.22  | 0.57 [0.35;<br>0.79] |
| Kinetic GFR                   | 4 hr  | 52.9 (27.4;<br>)             | 22.6 (0.0;<br>)               | 66.6 (45.2;<br>)             | 0.96 [0.93;<br>]      | 0.004 | 0.82 [0.69; 0.96]    |

|  |       |                      |                      |                      |                      |       |                   |
|--|-------|----------------------|----------------------|----------------------|----------------------|-------|-------------------|
|  |       | 70.7)                | 52.9)                | 77.2)                | 0.99]                |       |                   |
|  | 10 hr | 60.4 (38.8;<br>72.9) | 37.2 (24.1;<br>61.1) | 68.5 (56.7;<br>77.8) | 0.94 [0.90;<br>0.98] | 0.005 | 0.82 [0.68; 0.95] |
