# Supplementary material for: Novel Biomarkers for Early Detection of Acute Kidney Injury and Prediction of Long-Term Kidney Function Decline after Partial Nephrectomy
Source: Biomedicines. 2023 Mar 28;11(4):1046. doi: 10.3390/biomedicines11041046 (PMC10135876; doi:10.3390/biomedicines11041046)
Supplement: Supplementary file 1 [file biomedicines-11-01046-s001.zip › Table S2.pdf]

**Table S2.** Role of biomarkers as predictors of eGFR decline at 24 months postoperatively

|                                         | CC [IC95%]           | p value |
|-----------------------------------------|----------------------|---------|
| Serum creatinine 24h postoperatively    | -0.25 (-0.53; 0.07)  | 0.119   |
| Serum cystatin C 24h postoperatively    | -0.22 (-0.51; 0.11)  | 0.189   |
| Serum NGAL 10h postoperatively          | -0.31 (-0.60; 0.05)  | 0.082   |
| urinary NGAL 10h postoperatively        | -0.41 (-0.65; -0.11) | 0.009   |
| urinary NephroCheck 4h postoperatively  | -0.27 (-0.54; -0.05) | 0.096   |
| urinary NephroCheck 10h postoperatively | -0.47 (-0.69; -0.18) | 0.0023  |
| Proteinuria 10h postoperatively         | -0.26 (-0.54; 0.07)  | 0.11    |
| Albuminuria 24h postoperatively         | -0.23 (-0.53; 0.11)  | 0.178   |
| KineticGFR 4h postoperatively           | 0.34 (0.02; 0.59)    | 0.034   |
| KineticGFR 10h postoperatively          | 0.29 (0.03; 0.56)    | 0.07    |
